# Supplementary material for: Highly fluorescent carbon dots as an efficient nanoprobe for detection of clomifene citrate
Source: Royal Society of Chemistry journal article supplement (doi:10.1039/c9ra00360f), 2019-01-01
Supplement: c9ra00360f1.pdf [file c9ra00360f1.pdf]

*Supporting information*

**Highly fluorescent carbon dots as efficient nanoprobe for detection of clomifene citrate**

Yi Zhang,<sup>a,b</sup> Zhiyong Gao,<sup>a\*</sup> Xue Yang,<sup>b</sup> Genqing Yang,<sup>c</sup> Jiuli Chang,<sup>a</sup> and Kai Jiang<sup>a,d\*</sup>

<sup>a</sup> School of Chemistry and Chemical Engineering, Henan Normal University, Henan Xinxiang 453007, P.R. China.

<sup>b</sup> School of Laboratory Medicine, Xinxiang Medical University, Henan Xinxiang 453003, P.R. China.

<sup>c</sup> The Third Affiliated Hospital of Xinxiang Medical University, Henan Xinxiang 453000, P.R. China.

<sup>d</sup> School of Environment, Henan Normal University, Henan Xinxiang 453007, P.R. China.

\*Corresponding authors:

E-mail: zygao512@163.com (Z.Gao) Tel./Fax: +86 373 3326336

kjiang512@163.com (K. Jiang) Tel./Fax: +86 373 3328629.

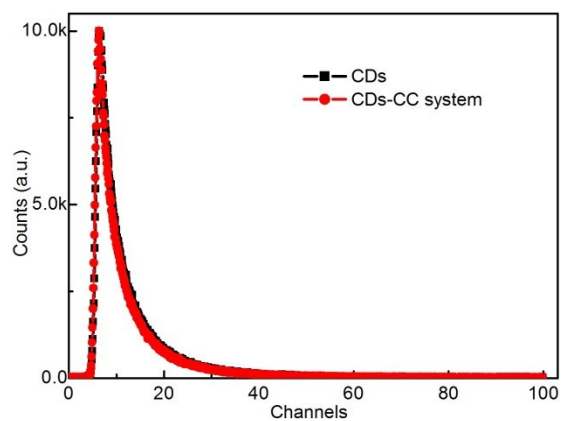

**Fig. S1** Fluorescence decay curve of aqueous CDs solution and CDs-CC system.  $C_{CDs}$ :  $125 \mu\text{g mL}^{-1}$ ,  $C_{CC}$ :  $125 \mu\text{g mL}^{-1}$ .

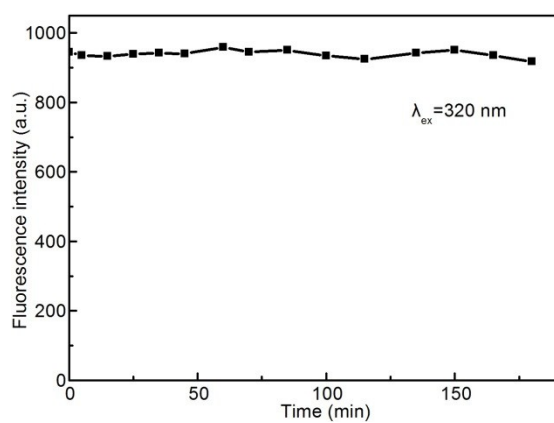

**Fig. S2** Fluorescence emission intensity of aqueous CDs solution under excitation at  $\lambda_{ex}=320 \text{ nm}$  for different time.  $C_{CDs}$ :  $125 \mu\text{g mL}^{-1}$ .

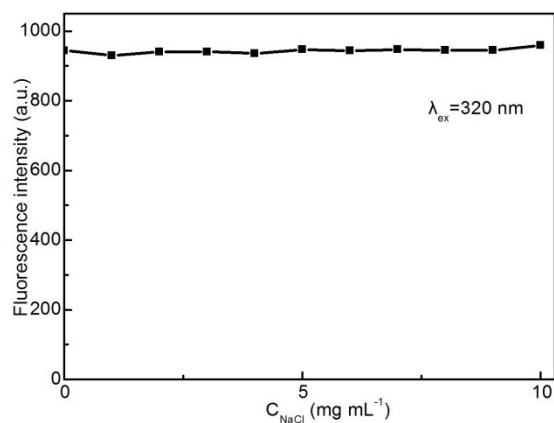

**Fig. S3** Fluorescence intensity of aqueous CDs solution at different NaCl concentrations.  $C_{\text{CDs}}$ : 125  $\mu\text{g mL}^{-1}$ .

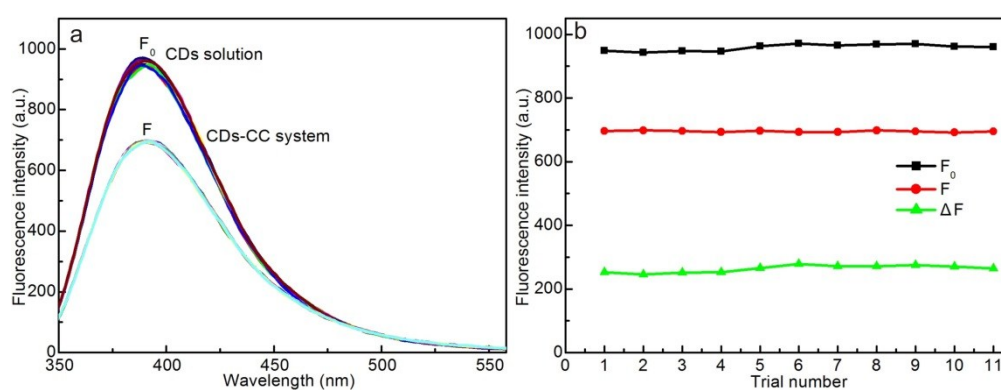

**Fig. S4** Reproducibility of fluorescence emission feature for CDs-CC system, (a) Fluorescence spectra of aqueous CDs solution and CDs-CC system (11 parallel trials), (b) Fluorescence emission intensities of CDs solution ( $F_0$ ), CDs-CC system ( $F$ ) and the intensity differences ( $\Delta F = F_0 - F$ ) in 11 parallel trials.  $C_{\text{CDs}}$ : 125  $\mu\text{g mL}^{-1}$ ,  $C_{\text{CC}}$ : 5  $\mu\text{g mL}^{-1}$ .
